# Supplementary material for: Association between Ustekinumab Trough Levels, Serum IL-22, and Oncostatin M Levels and Clinical and Biochemical Outcomes in Patients with Crohn’s Disease
Source: MDPI journal article supplement (doi:10.3390/jcm13061539), 2024-03-07
Supplement: s1 [file s1]

**Table S1:** Adverse events in patients undergoing Ustekinumab therapy during the study period.

| Adverse events (AEs) type | Patients | Number of AEs |
|---------------------------|----------|---------------|
| Mild AE                   | 10       | 10            |
| Major AE                  | 3        | 4             |
| Infection                 | 9        | 10            |
| Pyelonephritis            | 1        | 2             |
| GI infection              | 1        | 1             |
| Perianal abscess          | 3        | 3             |
| Abdominal abscess         | 3        | 3             |
| Herpes Zoster             | 1        | 1             |
| Malignancy                | 0        | 0             |
| Headache                  | 0        | 0             |
| Dry skin/pruritis         | 1        | 1             |
| Myalgias/arthritis        | 2        | 2             |
| Fatigue                   | 0        | 0             |
| Allergic reaction         | 1        | 1             |

**Table S2:** Clinical and biochemical outcomes at the fourth SC dose in patients with 12 and 8-week Ustekinumab dosing interval.

|                                        | Q12W ( <i>n</i> =21) | Q8W ( <i>n</i> =63) | P value |
|----------------------------------------|----------------------|---------------------|---------|
| UST concentration<br>(mean; SD; µg/mL) | 1.76 ± 1.06          | 3.97 ± 3.36         | 0.376   |
| Clinical response, n                   | 8                    | 20                  | 0.160   |
| Clinical remission, n                  | 17                   | 35                  | 0.004   |
| Steroid-free clinical<br>remission, n  | 16                   | 30                  | 0.011   |
| Biochemical remission,<br>n            | 6                    | 21                  | 0.146   |
